# Supplementary material
Source: Springer Nature journal article supplement (https://www.springermedizin.de/resource/supplementary/12990_2014_638_MOESM8_ESM.pdf/9612274)

### A Microdialysis probes behavior

### B Microdialysis probes electrophysiology

### C Recording sites electrophysiology

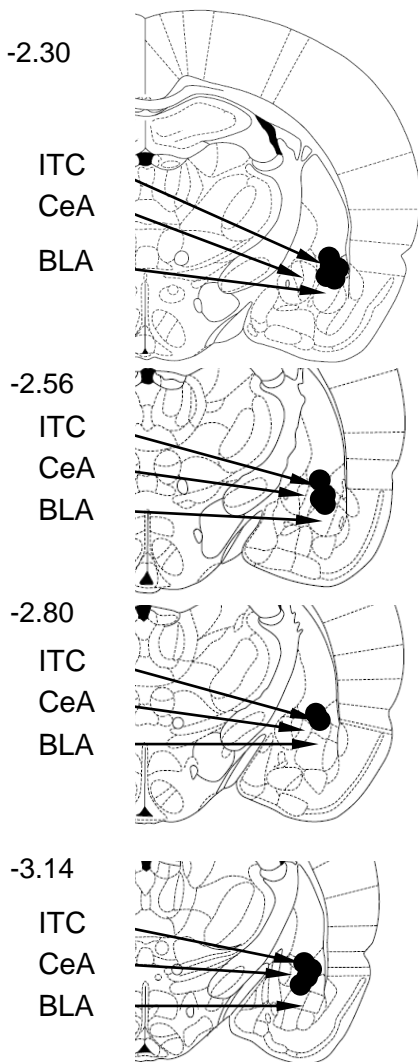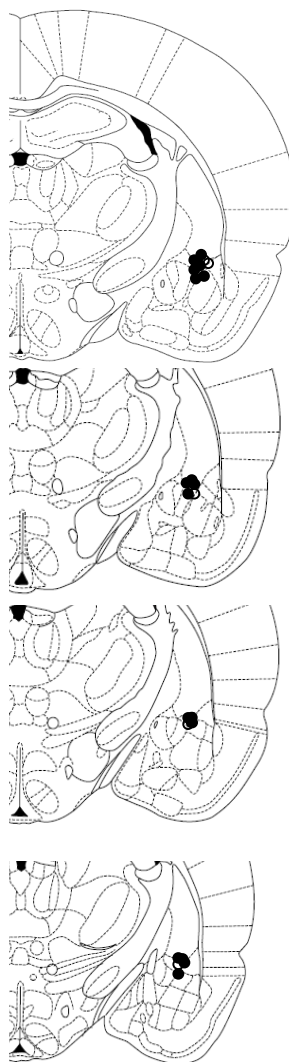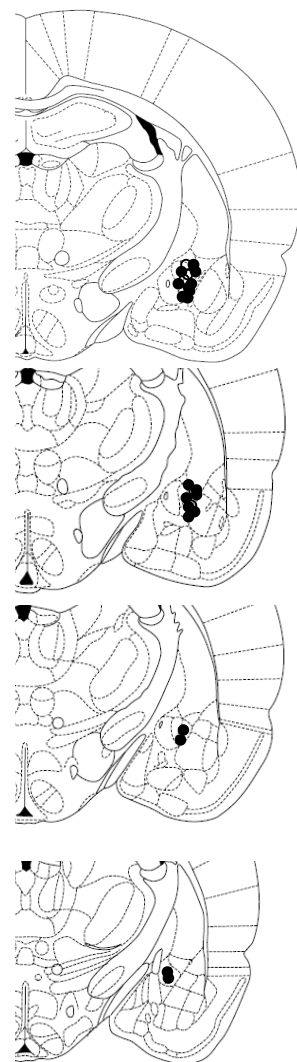

Supplement: MOESM8 [file 9612274]
